# Supplementary material for: Distinct input-specific mechanisms enable presynaptic homeostatic plasticity
Source: PubMed Central journal article supplement — bioRxiv. 2024 Sep 12:2024.09.10.612361. Preprint. [Version 1] doi: 10.1101/2024.09.10.612361 (PMC11419068; doi:10.1101/2024.09.10.612361), 2024-09-12
Supplement: media-1.pdf [file media-1.pdf]

| Figure | Label                         | [Ca <sup>2+</sup> ]<br>(mM) | Genotype                                                          | mEPSP<br>amp<br>(mV) | EPSC<br>amp (-nA)  | QC                 | mEPSP<br>freq.(Hz) | R <sub>in</sub><br>(MΩ) | V <sub>rest</sub> (mV) | n  | One-way<br>ANOVA, P<br>Value:<br>mEPSP,<br>EPSC, QC.          |
|--------|-------------------------------|-----------------------------|-------------------------------------------------------------------|----------------------|--------------------|--------------------|--------------------|-------------------------|------------------------|----|---------------------------------------------------------------|
| 1A, B  | wild type                     | 1.8                         | <i>w<sup>1118</sup></i>                                           | 1.01<br>(±0.03)      | 180.70<br>(±10.79) | 171.00<br>(±10.83) | 4.45<br>(±0.27)    | 8.75<br>(±0.41)         | -64.22<br>(±1.01)      | 8  | -                                                             |
| 1A, B  | GluRIIA                       | 1.8                         | <i>GluRIIA<sup>pv3</sup></i>                                      | 0.42<br>(±0.03)      | 155.6<br>(±13.28)  | 380.96<br>(±40.72) | 1.80<br>(±0.36)    | 7.75<br>(±0.56)         | -75.00<br>(±2.29)      | 7  | <0.0001<br>(****), 0.22<br>(ns),<br><0.0001<br>(****)         |
| 1A, B  | lb only                       | 1.8                         | <i>w<sub>r</sub>+</i> ;R27E09-GAL4/UAS-BoNT-C                     | 0.59<br>(±0.06)      | 52.35<br>(±4.15)   | 87.60<br>(±5.90)   | 1.98<br>(±0.22)    | 9.78<br>(±0.62)         | -72.86<br>(±1.81)      | 11 | -                                                             |
| 1A, B  | IIA, lb<br>only               | 1.8                         | <i>w<sub>r</sub>GluRIIA<sup>pv3</sup></i> ;R27E09-GAL4/UAS-BoNT-C | 0.29<br>(±0.01)      | 72.47<br>(±6.86)   | 256.29<br>(±17.9)  | 1.38(±0.10)        | 10.11<br>(±0.53)        | -67.51<br>(±2.03)      | 8  | <0.0001<br>(****), <0.01<br>(**),<br><0.0001<br>(****)        |
| 1A, B  | Is only                       | 1.8                         | <i>w<sub>r</sub>+</i> ;dHb9-GAL4/UAS-BoNT-C                       | 1.16<br>(±0.03)      | 121.13<br>(±7.95)  | 128.28<br>(±4.32)  | 2.22<br>(±0.23)    | 8.31<br>(±0.55)         | -65.12<br>(±1.68)      | 11 | -                                                             |
| 1A, B  | IIA, Is only                  | 1.8                         | <i>w<sub>r</sub>GluRIIA<sup>pv3</sup></i> ;dHb9-GAL4/UAS-BoNT-C   | 0.53<br>(±0.01)      | 71.93<br>(±2.52)   | 136.08<br>(±5.45)  | 1.28<br>(±0.19)    | 7.99<br>(±0.65)         | -67.80<br>(±1.43)      | 8  | <0.0001<br>(****),<br><0.0001<br>(****), 0.25<br>(ns)         |
| 1E     | lb only<br>(Is><br>BoNT)      | 0.4                         | <i>w<sub>r</sub>+</i> ;R27E09-GAL4/UAS-BoNT-C                     | 0.64<br>(±0.02)      | 9.01<br>(±1.98)    | 14.29<br>(±3.45)   | 1.30<br>(±0.24)    | 11.54<br>(±0.69)        | -67.92<br>(±1.26)      | 11 | -                                                             |
| 1E     | IIA, lb<br>only (Is><br>BoNT) | 0.4                         | <i>w<sub>r</sub>GluRIIA<sup>pv3</sup></i> ;R27E09-GAL4/UAS-BoNT-C | 0.39<br>(±0.01)      | 11.28<br>(±1.50)   | 28.22<br>(±3.05)   | 1.24<br>(±0.24)    | 8.52<br>(±0.51)         | -65.18<br>(±2.09)      | 14 | <0.0001<br>(****), 0.36<br>(ns), <0.01<br>(**)                |
| 1E     | lb only                       | 1.0                         | <i>w<sub>r</sub>+</i> ;R27E09-GAL4/UAS-BoNT-C                     | 0.67<br>(±0.03)      | 36.97<br>(±1.67)   | 55.62<br>(±2.48)   | 1.88<br>(±0.17)    | 9.08<br>(±0.78)         | -69.28<br>(±2.21)      | 13 | -                                                             |
| 1E     | IIA, lb<br>only               | 1.0                         | <i>w<sub>r</sub>GluRIIA<sup>pv3</sup></i> ;R27E09-GAL4/UAS-BoNT-C | 0.36<br>(±0.02)      | 55.21<br>(±1.74)   | 155.71<br>(±10.38) | 1.96<br>(±0.21)    | 8.29<br>(±0.61)         | -63.57<br>(±1.68)      | 9  | <0.0001<br>(****),<br><0.0001<br>(****),<br><0.001<br>(****)  |
| 1E     | lb only                       | 3.0                         | <i>w<sub>r</sub>+</i> ;R27E09-GAL4/UAS-BoNT-C                     | 0.70<br>(±0.03)      | 107.24<br>(±10.69) | 152.18<br>(±16.26) | 1.86<br>(±0.14)    | 8.81<br>(±0.94)         | -65.24<br>(±2.09)      | 8  | -                                                             |
| 1E     | IIA, lb<br>only               | 3.0                         | <i>w<sub>r</sub>GluRIIA<sup>pv3</sup></i> ;R27E09-GAL4/UAS-BoNT-C | 0.36<br>(±0.02)      | 107.38<br>(±10.75) | 307.45<br>(±38.85) | 1.38<br>(±0.20)    | 9.98<br>(±1.25)         | -66.51<br>(±2.55)      | 13 | <0.0001<br>(****), >0.99<br>(ns), <0.01<br>(**)               |
| 1E     | lb only                       | 6.0                         | <i>w<sub>r</sub>+</i> ;R27E09-GAL4/UAS-BoNT-C                     | 0.71<br>(±0.02)      | 113.34<br>(±6.95)  | 158.47<br>(±9.63)  | 1.98<br>(±0.21)    | 11.24<br>(±1.12)        | -68.79<br>(±2.05)      | 13 | -                                                             |
| 1E     | IIA, lb<br>only               | 6.0                         | <i>w<sub>r</sub>GluRIIA<sup>pv3</sup></i> ;R27E09-GAL4/UAS-BoNT-C | 0.37<br>(±0.02)      | 115.07<br>(±4.32)  | 312.43<br>(±7.61)  | 1.89<br>(±0.09)    | 7.28<br>(±0.93)         | -64.81<br>(±2.37)      | 10 | <0.0001<br>(****), 0.97<br>(ns),<br><0.0001<br>(****)         |
| 1F     | Is only<br>(lb>BoNT)          | 0.4                         | <i>w<sub>r</sub>+</i> ;dHb9-GAL4/UAS-BoNT-C                       | 1.31<br>(±0.06)      | 25.89<br>(±1.64)   | 20.60<br>(±2.77)   | 1.32<br>(±0.19)    | 10.91<br>(±0.75)        | -67.90<br>(±1.53)      | 8  | -                                                             |
| 1F     | IIA, Is only<br>(lb>BoNT)     | 0.4                         | <i>w<sub>r</sub>GluRIIA<sup>pv3</sup></i> ; dHb9-GAL4/UAS-BoNT-C  | 0.60<br>(±0.05)      | 14.17<br>(±1.99)   | 23.59<br>(±2.40)   | 1.20<br>(±0.07)    | 11.21<br>(±0.88)        | -63.48<br>(±0.57)      | 7  | <0.0001<br>(****),<br><0.001<br>(***), 0.50<br>(ns)           |
| 1F     | Is only                       | 1.0                         | <i>w<sub>r</sub>+</i> ;dHb9-GAL4/UAS-BoNT-C                       | 1.20<br>(±0.04)      | 88.62<br>(±4.72)   | 74.63<br>(±4.72)   | 1.21<br>(±0.12)    | 6.54<br>(±0.42)         | -67.28<br>(±2.41)      | 10 | -                                                             |
| 1F     | IIA, Is only                  | 1.0                         | <i>w<sub>r</sub>GluRIIA<sup>pv3</sup></i> ;dHb9-GAL4/UAS-BoNT-C   | 0.57<br>(±0.02)      | 47.66<br>(±0.49)   | 85.61<br>(±3.77)   | 1.56<br>(±0.08)    | 8.65<br>(±0.57)         | -63.86<br>(±1.72)      | 11 | <0.0001<br>(****),<br><0.0001<br>(****), 0.28<br>(ns)         |
| 1F     | Is only                       | 3.0                         | <i>w<sub>r</sub>+</i> ;dHb9-GAL4/UAS-BoNT-C                       | 1.26<br>(±0.07)      | 136.03<br>(±8.34)  | 114.11<br>(±5.97)  | 1.42<br>(±0.29)    | 7.52<br>(±0.66)         | -69.92<br>(±2.67)      | 8  | -                                                             |
| 1F     | IIA, Is only                  | 3.0                         | <i>w<sub>r</sub>GluRIIA<sup>pv3</sup></i> ;dHb9-GAL4/UAS-BoNT-C   | 0.59<br>(±0.05)      | 125.28<br>(±7.02)  | 225.12<br>(±29.27) | 2.24<br>(±0.66)    | 9.75<br>(±0.74)         | -64.83<br>(±2.07)      | 7  | <0.0001<br>(****),<br><0.0001<br>(****),<br><0.0001<br>(****) |
| 1F     | Is only                       | 6.0                         | <i>w<sub>r</sub>+</i> ;dHb9-GAL4/UAS-BoNT-C                       | 1.27<br>(±0.03)      | 132.46<br>(±7.41)  | 104.89<br>(±6.42)  | 1.38<br>(±0.14)    | 11.25<br>(±0.62)        | -62.69<br>(±2.55)      | 12 | -                                                             |
| 1F     | IIA, Is only                  | 6.0                         | <i>w<sub>r</sub>GluRIIA<sup>pv3</sup></i> ;dHb9-GAL4/UAS-BoNT-C   | 0.59<br>(±0.02)      | 131.81<br>(±1.97)  | 227.99<br>(±7.69)  | 1.71<br>(±0.13)    | 8.00<br>(±0.71)         | -63.54<br>(±2.05)      | 10 | <0.0001<br>(****), <0.99<br>(ns),<br><0.0001<br>(****)        |

| Figure | Label                                 | [Ca <sup>2+</sup> ]<br>(mM) | Genotype                                         | PhTx | mEPSP<br>amp(mV) | EPSC<br>amp (-nA)  | QC                 | mEPSP<br>freq (Hz) | R <sub>in</sub><br>(MΩ) | V <sub>rest</sub><br>(mV) | n  | One-way ANOVA,<br>P Value: mEPSP,<br>EPSC, QC.     |
|--------|---------------------------------------|-----------------------------|--------------------------------------------------|------|------------------|--------------------|--------------------|--------------------|-------------------------|---------------------------|----|----------------------------------------------------|
| 2A, B  | wild<br>type                          | 1.8                         | w <sup>1118</sup>                                | -    | 1.01<br>(±0.03)  | 180.70<br>(±10.79) | 171.00<br>(±10.83) | 4.45<br>(±0.27)    | 8.75<br>(±0.41)         | -64.22<br>(±1.01)         | 8  | -                                                  |
| 2A, B  | wild<br>type+<br>PhTx                 | 1.8                         | w <sup>1118</sup>                                | +    | 0.57<br>(±0.02)  | 176.11<br>(±8.40)  | 311.48<br>(±20.38) | 3.00<br>(±0.36)    | 8.85<br>(±0.56)         | -67.29<br>(±2.32)         | 9  | <0.0001 (****), 0.93<br>(ns), <0.001 (***)         |
| 2A, B  | lb only                               | 1.8                         | w <sub>r</sub> ++;R27E09-<br>GAL4/UAS-<br>BoNT-C | -    | 0.59<br>(±0.06)  | 52.35<br>(±4.15)   | 87.60<br>(±5.90)   | 1.98<br>(±0.22)    | 9.78<br>(±0.62)         | -72.86<br>(±1.81)         | 11 | -                                                  |
| 2A, B  | lb only+<br>PhTx                      | 1.8                         | w <sub>r</sub> ++;R27E09-<br>GAL4/UAS-<br>BoNT-C | +    | 0.35<br>(±0.02)  | 31.41<br>(±2.20)   | 92.68<br>(±11.06)  | 1.44<br>(±0.09)    | 10.20<br>(±0.95)        | -75.22<br>(±2.85)         | 8  | <0.0001<br>(****), <0.01 (**),<br>0.93 (ns)        |
| 2A, B  | ls only                               | 1.8                         | w <sub>r</sub> ++;dHb9-<br>GAL4/UAS-<br>BoNT-C   | -    | 1.16<br>(±0.03)  | 121.13<br>(±7.95)  | 128.28<br>(±4.32)  | 2.22<br>(±0.23)    | 8.31<br>(±0.55)         | -65.12<br>(±1.68)         | 11 | -                                                  |
| 2A, B  | ls only<br>+ PhTx                     | 1.8                         | w <sub>r</sub> ++;dHb9-<br>GAL4/UAS-<br>BoNT-C   | +    | 0.46<br>(±0.02)  | 104.67<br>(±7.59)  | 231.23<br>(±19.83) | 2.20<br>(±0.11)    | 12.05<br>(±1.05)        | -62.96<br>(±1.39)         | 11 | <0.0001 (****), 0.15<br>(ns), <0.0001 (****)       |
| 2E     | lb only<br>(ls><br>BoNT)              | 0.4                         | w <sub>r</sub> ++;R27E09-<br>GAL4/UAS-<br>BoNT-C | -    | 0.64<br>(±0.02)  | 9.01<br>(±1.98)    | 14.29<br>(±3.45)   | 1.30<br>(±0.24)    | 11.54<br>(±0.69)        | -67.92<br>(±1.26)         | 11 | -                                                  |
| 2E     | lb only<br>(ls><br>BoNT)<br>+ PhTx    | 0.4                         | w <sub>r</sub> ++;R27E09-<br>GAL4/UAS-<br>BoNT-C | +    | 0.36<br>(±0.03)  | 4.38<br>(±0.55)    | 12.04<br>(±1.05)   | 1.43<br>(±0.13)    | 7.50<br>(±0.51)         | -61.89<br>(±0.48)         | 10 | <0.0001 (****),<br><0.05(*), 0.82 (ns)             |
| 2E     | lb only                               | 1.0                         | w <sub>r</sub> ++;R27E09-<br>GAL4/UAS-<br>BoNT-C | -    | 0.67<br>(±0.03)  | 36.97<br>(±1.67)   | 55.62<br>(±2.48)   | 1.88<br>(±0.17)    | 9.06<br>(±0.78)         | -69.28<br>(±2.21)         | 13 | -                                                  |
| 2E     | lb only<br>+ PhTx                     | 1.0                         | w <sub>r</sub> ++;R27E09-<br>GAL4/UAS-<br>BoNT-C | +    | 0.42<br>(±0.03)  | 20.51<br>(±0.47)   | 49.55<br>(±3.38)   | 1.92<br>(±0.07)    | 7.55<br>(±0.85)         | -64.48<br>(±1.54)         | 9  | <0.0001 (****),<br><0.0001 (****),<br>0.68 (ns)    |
| 2E     | lb only                               | 3.0                         | w <sub>r</sub> ++;R27E09-<br>GAL4/UAS-<br>BoNT-C | -    | 0.70<br>(±0.03)  | 107.24<br>(±10.69) | 152.18<br>(±16.26) | 1.86<br>(±0.14)    | 8.81<br>(±0.94)         | -65.24<br>(±2.09)         | 8  | -                                                  |
| 2E     | lb only<br>+ PhTx                     | 3.0                         | w <sub>r</sub> ++;R27E09-<br>GAL4/UAS-<br>BoNT-C | +    | 0.44<br>(±0.02)  | 90.84<br>(±5.42)   | 210.07<br>(±16.74) | 1.79<br>(±0.24)    | 10.85<br>(±0.65)        | -63.94<br>(±1.16)         | 11 | <0.0001 (****), 0.41<br>(ns), 0.34 (ns)            |
| 2E     | lb only                               | 6.0                         | w <sub>r</sub> ++;R27E09-<br>GAL4/UAS-<br>BoNT-C | -    | 0.71<br>(±0.02)  | 113.34<br>(±6.95)  | 158.47<br>(±9.63)  | 1.98<br>(±0.21)    | 11.24<br>(±1.12)        | -68.79<br>(±2.05)         | 13 | -                                                  |
| 2E     | lb only<br>+ PhTx                     | 6.0                         | w <sub>r</sub> ++;R27E09-<br>GAL4/UAS-<br>BoNT-C | +    | 0.44<br>(±0.03)  | 105.81<br>(±7.10)  | 245.31<br>(±18.32) | 1.90<br>(±0.13)    | 9.95<br>(±0.68)         | -62.97<br>(±1.43)         | 9  | <0.0001 (****), 0.64<br>(ns), <0.0001 (****)       |
| 2F     | ls only<br>(lb>Bo<br>NT)              | 0.4                         | w <sub>r</sub> ++;dHb9-<br>GAL4/UAS-<br>BoNT-C   | -    | 1.31<br>(±0.06)  | 25.89<br>(±1.64)   | 20.60<br>(±2.77)   | 1.32<br>(±0.19)    | 10.91<br>(±0.75)        | -67.90<br>(±1.53)         | 8  | -                                                  |
| 2F     | ls only<br>(lb>Bo<br>NT)<br>+<br>PhTx | 0.4                         | w <sub>r</sub> ++;dHb9-<br>GAL4/UAS-<br>BoNT-C   | +    | 0.61<br>(±0.02)  | 21.90<br>(±2.11)   | 35.12<br>(±2.27)   | 1.65<br>(±0.12)    | 9.55<br>(±1.30)         | -63.81<br>(±2.07)         | 10 | <0.0001 (****), 0.23<br>(ns), <0.0001 (****)       |
| 2F     | ls only                               | 1.0                         | w <sub>r</sub> ++;dHb9-<br>GAL4/UAS-<br>BoNT-C   | -    | 1.20<br>(±0.04)  | 88.62<br>(±4.72)   | 74.63<br>(±4.72)   | 1.21<br>(±0.12)    | 6.54<br>(±0.42)         | -67.28<br>(±2.41)         | 10 | -                                                  |
| 2F     | ls only<br>+ PhTx                     | 1.0                         | w <sub>r</sub> ++;dHb9-<br>GAL4/UAS-<br>BoNT-C   | +    | 0.66<br>(±0.08)  | 67.22<br>(±5.31)   | 110.29<br>(±4.72)  | 2.50<br>(±0.11)    | 7.50<br>(±0.81)         | -66.23<br>(±1.98)         | 8  | <0.0001 (****),<br><0.0001 (****),<br><0.001 (***) |
| 2F     | ls only                               | 3.0                         | w <sub>r</sub> ++;dHb9-<br>GAL4/UAS-<br>BoNT-C   | -    | 1.26<br>(±0.07)  | 136.03<br>(±8.34)  | 114.11<br>(±5.97)  | 1.42<br>(±0.29)    | 7.52<br>(±0.66)         | -69.92<br>(±2.67)         | 9  | -                                                  |
| 2F     | ls only<br>+ PhTx                     | 3.0                         | w <sub>r</sub> ++;dHb9-<br>GAL4/UAS-<br>BoNT-C   | +    | 0.68(±0.02<br>)  | 154.28<br>(±22.42) | 225.12<br>(±29.27) | 1.77<br>(±0.24)    | 8.54<br>(±0.76)         | -65.10<br>(±2.03)         | 9  | <0.0001 (****),<br><0.0001 (****),<br><0.01 (**)   |
| 2F     | ls only                               | 6.0                         | w <sub>r</sub> ++;dHb9-<br>GAL4/UAS-<br>BoNT-C   | -    | 1.27<br>(±0.03)  | 132.46<br>(±7.41)  | 104.89<br>(±6.15)  | 1.38<br>(±0.14)    | 11.25<br>(±0.62)        | -62.69<br>(±2.55)         | 12 | -                                                  |
| 2F     | ls only<br>+ PhTx                     | 6.0                         | w <sub>r</sub> ++;dHb9-<br>GAL4/UAS-<br>BoNT-C   | +    | 0.64<br>(±0.04)  | 145.79<br>(±10.66) | 227.99<br>(±7.69)  | 1.77<br>(±0.07)    | 8.85<br>(±0.98)         | -63.27<br>(±2.47)         | 10 | <0.0001 (****),<br><0.01 (**), <0.0001<br>(****)   |

| Figure | Label | Genotype | PhTx | BRP mean int.<br>(% change) | RBP mean int.<br>(% change) | Cac mean int.<br>(% change) | n (puncta): BRP, RBP, Cac | P Value (significance): BRP<br>density (paired T-test), mean<br>intensity of BRP, RBP, Cac<br>(Mann-Whitney -test) |
|--------|-------|----------|------|-----------------------------|-----------------------------|-----------------------------|---------------------------|--------------------------------------------------------------------------------------------------------------------|
|--------|-------|----------|------|-----------------------------|-----------------------------|-----------------------------|---------------------------|--------------------------------------------------------------------------------------------------------------------|

|    |           |                                                      |   |               |               |               |               |                                                |
|----|-----------|------------------------------------------------------|---|---------------|---------------|---------------|---------------|------------------------------------------------|
| 3B | Ib        | <i>Cac<sup>stGFP-N</sup>;+;+</i>                     | - | -             | -             | -             | 283, 333, 305 | -                                              |
| 3B | IIA, Ib   | <i>Cac<sup>stGFP-N</sup>;GluRIIA<sup>pv3</sup>;+</i> | - | 201.2 (±4.22) | 126.1 (±3.89) | 177.3 (±3.85) | 238, 204, 252 | <0.0001 (****), <0.0001 (****), <0.0001 (****) |
| 3D | Is        | <i>Cac<sup>stGFP-N</sup>;+;+</i>                     | - | -             | -             | -             | 148, 113, 158 | -                                              |
| 3D | Is + PhTx | <i>Cac<sup>stGFP-N</sup>;+;+</i>                     | + | 158.6 (±6.52) | 149.1 (±3.32) | 138.4 (±3.77) | 140,134,177   | <0.0001 (****), <0.0001 (****), <0.0001 (****) |

| Figure | Label     | Genotype                                             | PhTx | Brp nanomod./Ring | n (puncta) | P Value (significance): Mann-Whitney test |
|--------|-----------|------------------------------------------------------|------|-------------------|------------|-------------------------------------------|
| 4B     | Ib        | <i>Cac<sup>stGFP-N</sup>;+;+</i>                     | -    | 5.25 (±0.20)      | 21         | -                                         |
| 4B     | IIA, Ib   | <i>Cac<sup>stGFP-N</sup>;GluRIIA<sup>pv3</sup>;+</i> | -    | 7.01 (±0.35)      | 12         | 0.0002 (***)                              |
| 4H     | Is        | <i>Cac<sup>stGFP-N</sup>;+;+</i>                     | -    | 4.56 (±0.21)      | 20         | -                                         |
| 4H     | Is + PhTx | <i>Cac<sup>stGFP-N</sup>;+;+</i>                     | +    | 3.99 (±0.38)      | 8          | 0.2525 (ns)                               |

| Figure | Label     | Genotype                                             | PhTx | Cac area (nm <sup>2</sup> ) | BRP ring area (nm <sup>2</sup> ) | Cac/BRP area ratio (%) | n (puncta): BRP, Cac | Unpaired T-test ,P Value (significance): BRP ring area (μm <sup>2</sup> ), RBP/BRP area ratio (%), nanomodules/ring, |
|--------|-----------|------------------------------------------------------|------|-----------------------------|----------------------------------|------------------------|----------------------|----------------------------------------------------------------------------------------------------------------------|
| 4C, D  | Ib        | <i>Cac<sup>stGFP-N</sup>;+;+</i>                     | -    | 23392 (±1267)               | 64359 (±2507)                    | 36.11 (±1.317%)        | 43, 48               | -                                                                                                                    |
| 4C, D  | IIA, Ib   | <i>Cac<sup>stGFP-N</sup>;GluRIIA<sup>pv3</sup>;+</i> | -    | 29872 (±1665)               | 78405 (±3469)                    | 39.20 (±1.635%)        | 47, 52               | 0.2821 (ns)                                                                                                          |
| 4I, J  | Is        | <i>Cac<sup>stGFP-N</sup>;+;+</i>                     | -    | 23712 (±1493)               | 44762 (±3269)                    | 55.52 (±2.485%)        | 19, 21               | -                                                                                                                    |
| 4I, J  | Is + PhTx | <i>Cac<sup>stGFP-N</sup>;+;+</i>                     | +    | 17877 (±935.2)              | 46429 (±2864)                    | 39.68 (±2.526%)        | 17, 19               | 0.0003 (***)                                                                                                         |

| Figure | Label     | Genotype                                             | PhTx | RBP area (nm <sup>2</sup> ) | BRP ring area (nm <sup>2</sup> ) | RBP/BRP area ratio (%) | n (puncta): BRP, RBP | Unpaired T-test ,P Value (significance): BRP ring area (μm <sup>2</sup> ), RBP/BRP area ratio (%), nanomodules/ring, |
|--------|-----------|------------------------------------------------------|------|-----------------------------|----------------------------------|------------------------|----------------------|----------------------------------------------------------------------------------------------------------------------|
| 4C, D  | Ib        | <i>Cac<sup>stGFP-N</sup>;+;+</i>                     | -    | 36219 (±1668)               | 62727 (±3564)                    | 60.28 (±2.015%)        | 25, 25               | -                                                                                                                    |
| 4C, D  | IIA, Ib   | <i>Cac<sup>stGFP-N</sup>;GluRIIA<sup>pv3</sup>;+</i> | -    | 48696 (±2290)               | 79621 (±3259)                    | 62.26 (±1.365%)        | 42, 42               | 0.6785 (ns)                                                                                                          |
| 4I, J  | Is        | <i>Cac<sup>stGFP-N</sup>;+;+</i>                     | -    | 34545 (±2081)               | 55028 (±2738)                    | 62.27 (±1.888%)        | 20, 20               | -                                                                                                                    |
| 4I, J  | Is + PhTx | <i>Cac<sup>stGFP-N</sup>;+;+</i>                     | +    | 30459 (±1568)               | 50574 (±2468)                    | 62.42 (±1.719%)        | 24, 24               | 0.9932 (ns)                                                                                                          |

| Figure | Label     | [Ca <sup>2+</sup> ] (mM) | Genotype                                                               | PhTx | Indicator         | dR/R         | Decay (ms)  | Rise (ms)   | n  | Paired T-test, P Value (significance): ratio of indicators |
|--------|-----------|--------------------------|------------------------------------------------------------------------|------|-------------------|--------------|-------------|-------------|----|------------------------------------------------------------|
| 5B, C  | Ib        | 1.8                      | <i>w;+;OK319-GAL4/UAS-Syt::mScarlet::GCaMP8f</i>                       | -    | GCaMP8f /mScarlet | 0.34 (±0.01) | 75.4 (±3.1) | 34.7 (±1.4) | 17 | -                                                          |
| 5B, C  | IIA, Ib   | 1.8                      | <i>w;+;OK319-GAL4,GluRIIA<sup>pv3</sup>/UAS-Syt::mScarlet::GCaMP8f</i> | -    | GCaMP8f /mScarlet | 0.51 (±0.03) | 69.2 (±2.0) | 28.6 (±0.8) | 25 | <0.0001 (****)                                             |
| 5E, F  | Is        | 1.8                      | <i>w;+;OK319-GAL4/UAS-Syt::mScarlet::GCaMP8f</i>                       | -    | GCaMP8f /mScarlet | 0.76 (±0.05) | 78.8 (±3.5) | 34.7 (±1.1) | 19 | -                                                          |
| 5E, F  | Is + PhTx | 1.8                      | <i>w;+;OK319-GAL4/UAS-Syt::mScarlet::GCaMP8f</i>                       | +    | GCaMP8f /mScarlet | 0.79 (±0.03) | 81.1 (±2.3) | 32.0 (±0.9) | 24 | 0.909 (ns)                                                 |

| Figure | Label     | [Ca <sup>2+</sup> ] (mM) | Genotype                                              | PhTx | Cum. EPSC(-nA) | Est. RRP size    | R <sub>in</sub> (MΩ) | V <sub>rest</sub> (mV) | n  | Unpaired T-test, P Value (significance): Cum. EPSC, RRP size |
|--------|-----------|--------------------------|-------------------------------------------------------|------|----------------|------------------|----------------------|------------------------|----|--------------------------------------------------------------|
| 6A, B  | Ib only   | 3.0                      | <i>w;+;R27E09-GAL4/UAS-BoNT-C</i>                     | -    | 586.6 (±47.72) | 952.3 (±77.46)   | 6.31 (±0.67)         | -66.78 (±1.55)         | 15 | -                                                            |
| 6A, B  | IIA, Ib   | 3.0                      | <i>w;GluRIIA<sup>pv3</sup>;R27E09-GAL4/UAS-BoNT-C</i> | -    | 351.4 (±33.22) | 994.3(±94.01)    | 5.81 (±0.38)         | -63.34 (±2.71)         | 12 | <0.001 (***) , 0.73 (ns)                                     |
| 6C, D  | Is only   | 3.0                      | <i>w;+;dHb9-GAL4/UAS-BoNT-C</i>                       | -    | 688.5 (±70.56) | 719.7 (±73.75)   | 8.20 (±0.56)         | -65.99 (±1.80)         | 10 | -                                                            |
| 6C, D  | Is + PhTx | 3.0                      | <i>w;+;dHb9-GAL4/UAS-BoNT-C</i>                       | +    | 568.3 (±85.00) | 1566.00 (±160.4) | 7.25 (±0.77)         | -67.83 (±1.93)         | 9  | 0.28 (ns), <0.001 (***)                                      |

| Figure   | Label     | Genotype                                                       | PhTx | Release site # | R <sub>in</sub> (MΩ) | V <sub>rest</sub> (mV) | n  | Unpaired T-test, P Value (significance): Release site # |
|----------|-----------|----------------------------------------------------------------|------|----------------|----------------------|------------------------|----|---------------------------------------------------------|
| 7A, B, C | Ib        | w <sup>+</sup> ;R27E09-GAL4/UAS-BoNT-C                         | -    | 518.8 (±47.72) | 6.00 (±0.5)          | -67.8 (±1.02)          | 9  | -                                                       |
| 7A, B, C | IIA, Ib   | w <sup>+</sup> ;GluRIIA <sup>pv3</sup> ;R27E09-GAL4/UAS-BoNT-C | -    | 794.4 (±60.76) | 5.6 (±0.55)          | -66 (±0.83)            | 8  | 0.0026 (**)                                             |
| 7G, H, I | Is        | w <sup>+</sup> ;dHb9-GAL4/UAS-BoNT-C                           | -    | 329.1 (±31.27) | 7.5 (±0.89)          | -66.9(±1.14)           | 10 | -                                                       |
| 7G, H, I | Is + PhTx | w <sup>+</sup> ;dHb9-GAL4/UAS-BoNT-C                           | +    | 533.3 (±61.83) | 5.5 (±0.37)          | -67.7(±1.47)           | 7  | 0.0057 (**)                                             |

| Figure | Label     | Genotype                                          | PhTx | Unc13A mean int. (% change) | Unc13A area (μm <sup>2</sup> ) | n (puncta) | P Value (significance): mean intensity of Unc13A (Mann-Whitney test), Unc13A area (Mann-Whitney test), |
|--------|-----------|---------------------------------------------------|------|-----------------------------|--------------------------------|------------|--------------------------------------------------------------------------------------------------------|
| 7E, F  | Ib        | Cac <sup>stGFP-N</sup> ;+;+                       | -    | -                           | 0.073 (±0.003)                 | 289, 151   | -                                                                                                      |
| 7E, F  | IIA, Ib   | Cac <sup>stGFP-N</sup> ;GluRIIA <sup>pv3</sup> ;+ | -    | 151.4 (±2.10)               | 0.086 (±0.003)                 | 232, 158   | <0.0001 (****); 0.0043 (**)                                                                            |
| 7K, L  | Is        | Cac <sup>stGFP-N</sup> ;+;+                       | -    | -                           | 0.039 (±0.003)                 | 123, 49    | -                                                                                                      |
| 7K, L  | Is + PhTx | Cac <sup>stGFP-N</sup> ;+;+                       | +    | 122.6 (±4.82)               | 0.044 (±0.003)                 | 124, 61    | 0.0039 (**); 0.3289 (ns)                                                                               |

| Figure | Label     | [Ca <sup>2+</sup> ] (mM) | Genotype                                                       | PhTx | EGTA-AM | EPSC (nA)       | % of baseline (-EGTA) | R <sub>in</sub> (MΩ) | V <sub>rest</sub> (mV) | n  | Unpaired T-test, P Value (significance): % baseline (-EGTA) |
|--------|-----------|--------------------------|----------------------------------------------------------------|------|---------|-----------------|-----------------------|----------------------|------------------------|----|-------------------------------------------------------------|
| 8A, B  | Ib only   | 1.8                      | w <sup>+</sup> ;R27E09-GAL4/UAS-BoNT-C                         | -    | -       | 71.164(±4.06)   | -                     | 7.27 (±0.51)         | -69.51 (±1.02)         | 17 | -                                                           |
| 8A, B  | Ib only   | 1.8                      | w <sup>+</sup> ;R27E09-GAL4/UAS-BoNT-C                         | -    | 50 μM   | -43.41 (±2.72)  | 61.00 (±4.10)         | 6.44 (±0.57)         | -67.51 (±2.61)         | 8  | -                                                           |
| 8A, B  | IIA, Ib   | 1.8                      | w <sup>+</sup> ;GluRIIA <sup>pv3</sup> ;R27E09-GAL4/UAS-BoNT-C | -    | -       | -84.82 (±4.02)  | -                     | 7.52 (±0.68)         | -63.42 (±1.57)         | 8  | -                                                           |
| 8A, B  | IIA, Ib   | 1.8                      | w <sup>+</sup> ;GluRIIA <sup>pv3</sup> ;R27E09-GAL4/UAS-BoNT-C | -    | 50 μM   | -80.98 (±5.65)  | 79.71 (±3.975)        | 6.51 (±0.69)         | -65.88 (±1.24)         | 14 | <0.001 (**)                                                 |
| 8C, D  | Is only   | 1.8                      | w <sup>+</sup> ;dHb9-GAL4/UAS-BoNT-C                           | -    | -       | -145.80 (±6.13) | -                     | 6.74 (±0.81)         | -64.11 (±1.71)         | 8  | -                                                           |
| 8C, D  | Is only   | 1.8                      | w <sup>+</sup> ;dHb9-GAL4/UAS-BoNT-C                           | -    | 50 μM   | -108.05 (±5.28) | 76.11 (±3.926)        | 7.78 (±0.95)         | -64.27 (±2.84)         | 10 | -                                                           |
| 8C, D  | Is + PhTx | 1.8                      | w <sup>+</sup> ;dHb9-GAL4/UAS-BoNT-C                           | +    | -       | 152.80(±8.50)   | -                     | 9.24 (±0.88)         | -67.85(±1.79)          | 8  | -                                                           |
| 8C, D  | Is + PhTx | 1.8                      | w <sup>+</sup> ;dHb9-GAL4/UAS-BoNT-C                           | +    | 50 μM   | -88.55 (±3.90)  | 58.38 (±2.962)        | 7.76 (±0.61)         | -68.82 (±1.82)         | 10 | <0.001 (**)                                                 |

| Figure | Label     | Genotype               | +PhTx | merged BRP rings | total BRP rings | n (boutons) | Unpaired T-test, P Value (significance): Brp puncta #/M6 NMJ |
|--------|-----------|------------------------|-------|------------------|-----------------|-------------|--------------------------------------------------------------|
| S1B    | Ib        | w <sup>1118</sup>      | -     | 3.947 (±0.4152)  | 18.89 (±1.139)  | 25          | -                                                            |
| S1B    | IIA, Ib   | GluRIIA <sup>pv3</sup> | -     | 5.267 (±0.4306)  | 18 (±1.480)     | 15          | <0.0001 (****)                                               |
| S1D    | Is        | w <sup>1118</sup>      | -     | 1.156 (±0.1687)  | 6.750 (±0.5803) | 39          | -                                                            |
| S1D    | Is + PhTx | w <sup>1118</sup>      | +     | 1.650 (±0.2325)  | 7.650 (±0.5771) | 27          | 0.1188 (ns)                                                  |
