# Supplementary material for: Distinct input-specific mechanisms enable presynaptic homeostatic plasticity
Source: PubMed Central journal article supplement — bioRxiv. 2024 Sep 12:2024.09.10.612361. Preprint. [Version 1] doi: 10.1101/2024.09.10.612361 (PMC11419068; doi:10.1101/2024.09.10.612361), 2024-09-12
Supplement: media-2.pdf [file media-2.pdf]

## KEY RESOURCES TABLE

| REAGENT/RESOURCE                                            | SOURCE               | IDENTIFIER                                    |
|-------------------------------------------------------------|----------------------|-----------------------------------------------|
| <b>Chemicals, peptides, and recombinant proteins</b>        |                      |                                               |
| Philanthotoxin-433                                          | Sigma-Aldrich        | 276684-27-6                                   |
| EGTA-AM                                                     | Sigma-Aldrich        | 99590-86-0                                    |
| <b>Antibodies</b>                                           |                      |                                               |
|                                                             | <b>Dilution</b>      |                                               |
| Mouse anti-BRP (nc82)                                       | 1:250                | Developmental Studies Hybridoma Bank (DSHB)   |
| Guinea pig anti-RBP                                         | 1:100                | (He et al., 2023)                             |
| Guinea pig anti-Unc13A                                      | 1:100                | (Böhme et al., 2016)                          |
| Chicken anti-GFP                                            | 1:400                | Aves Labs                                     |
| Alexa Fluor 488 conjugated Goat anti-Horseradish Peroxidase | 1:400                | Jackson ImmunoResearch Laboratories (Jackson) |
| Alexa Fluor 488 conjugated secondary antibodies             | 1:400                | Jackson                                       |
| Cy3-conjugated secondary antibodies                         | 1:400                | Jackson                                       |
| Alexa Fluor 594 conjugated secondary antibodies             | 1:400                | Jackson                                       |
| Alexa Fluor 647 conjugated Goat anti-Horseradish Peroxidase | 1:400                | Jackson                                       |
| STAR RED conjugated secondary antibodies                    | 1:200                | Abberior                                      |
|                                                             |                      | STRED-1001<br>STRED-1006                      |
| <b>Drosophila Strains</b>                                   |                      |                                               |
| UAS-Syt::mScarlet::GCaMP8f                                  | (Li et al., 2021)    |                                               |
| UAS-BoNT-C                                                  | (Han et al., 2022)   |                                               |
| <i>Cac<sup>sfGFP-N</sup></i>                                | (Gratz et al., 2019) |                                               |
| OK319-Gal4                                                  | (Beck et al., 2012)  |                                               |
| dHb9-GAL4 (Ib-Gal4)                                         | BDSC                 | 83004                                         |
| GMR27E09-GAL4 (Is-Gal4)                                     | BDSC                 | 49227                                         |
| <i>GluRIIA<sup>pv3</sup></i>                                | (Han et al., 2023)   |                                               |
| <i>w<sup>1118</sup></i>                                     | BDSC                 | 5905                                          |
| <b>Software and Algorithms</b>                              |                      |                                               |
| NIS Elements software                                       | Nikon                | 4.51.01                                       |
| Huygens Essential                                           | SVI                  | 22.10                                         |
| Axon pCLAMP                                                 | Molecular Devices    | 10.7                                          |
| MiniAnalysis                                                | Synaptosoft          | 6.0.3                                         |
| GraphPad Prism                                              | GraphPad             | 8.0.1                                         |

## REFERENCES

- Beck, E. S., Gasque, G., Imlach, W. L., Jiao, W., Jiwon Choi, B., Wu, P.-S., Kraushar, M. L., & McCabe, B. D. (2012, 2012-05-16). Regulation of Fasciclin II and Synaptic Terminal Development by the Splicing Factor Beag. *Journal of Neuroscience*, 32(20), 7058-7073. <https://doi.org/10.1523/jneurosci.3717-11.2012>
- Böhme, M. A., Beis, C., Reddy-Alla, S., Reynolds, E., Mampell, M. M., Grasskamp, A. T., Lützkendorf, J., Bergeron, D. D., Driller, J. H., Babikir, H., Göttfert, F., Robinson, I. M., O'Kane, C. J., Hell, S. W., Wahl, M. C., Stelzl, U., Loll, B., Walter, A. M., & Sigrist, S. J. (2016, 2016/10/01). Active zone scaffolds differentially accumulate Unc13 isoforms to tune Ca<sup>2+</sup> channel-vesicle coupling. *Nature Neuroscience*, 19(10), 1311-1320. <https://doi.org/10.1038/nn.4364>
- Gratz, S. J., Goel, P., Bruckner, J. J., Hernandez, R. X., Khateeb, K., Macleod, G. T., Dickman, D., & O'Connor-Giles, K. M. (2019, 2019-01-28). Endogenous tagging reveals differential regulation of Ca<sup>2+</sup> channels at single AZs during presynaptic homeostatic potentiation and depression. *The Journal of Neuroscience*, 3068-3018. <https://doi.org/10.1523/jneurosci.3068-18.2019>
- Han, Y., Chien, C., Goel, P., He, K., Pinales, C., Buser, C., & Dickman, D. (2022, 2022-08-22). Botulinum neurotoxin accurately separates tonic vs. phasic transmission and reveals heterosynaptic plasticity rules in *Drosophila*. *eLife*, 11. <https://doi.org/10.7554/elife.77924>
- Han, Y., Goel, P., Chen, J., Perry, S., Tran, N., Nishimura, S., Sanjani, M., Chien, C., & Dickman, D. (2023). Excess glutamate release triggers subunit-specific homeostatic receptor scaling. *Cell Reports*, 42(7). <https://doi.org/10.1016/j.celrep.2023.112775>
- He, K., Han, Y., Li, X., Hernandez, R. X., Riboul, D. V., Fegghi, T., Justs, K. A., Mahneva, O., Perry, S., Macleod, G. T., & Dickman, D. (2023). Physiologic and Nanoscale Distinctions Define Glutamatergic Synapses in Tonic vs Phasic Neurons. *The Journal of Neuroscience*, 43(25), 4598-4611. <https://doi.org/10.1523/jneurosci.0046-23.2023>
- Li, X., Chien, C., Han, Y., Sun, Z., Chen, X., & Dickman, D. (2021). Autocrine inhibition by a glutamate-gated chloride channel mediates presynaptic homeostatic depression. *Science Advances*, 7(49), eabj1215. <https://doi.org/doi:10.1126/sciadv.abj1215>
