# Supplementary figures and images for: Distinct input-specific mechanisms enable presynaptic homeostatic plasticity
Source: PubMed Central journal article supplement — bioRxiv. 2024 Sep 12:2024.09.10.612361. Preprint. [Version 1] doi: 10.1101/2024.09.10.612361 (PMC11419068; doi:10.1101/2024.09.10.612361), 2024-09-12

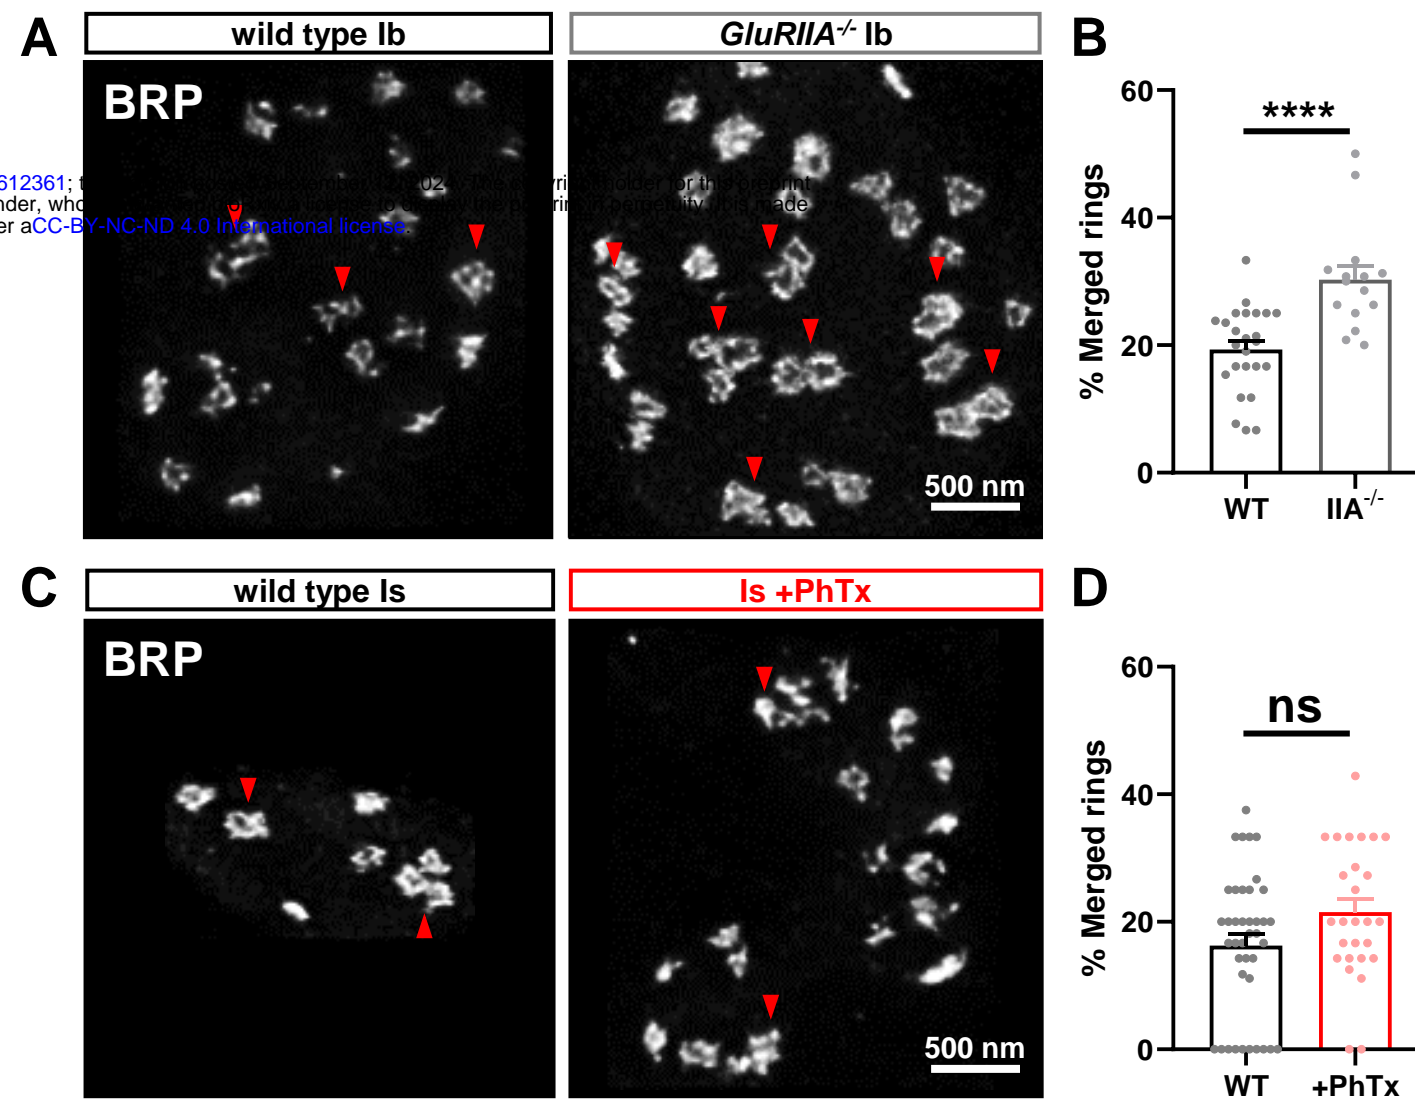

Figure S1: PHP signaling does not induce merging of Brp rings at phasic MN-Is synapses.

Supplement: NIHPP2024.09.10.612361v1-supplement-3.pdf [file NIHPP2024.09.10.612361v1-supplement-3.pdf]
